# Supplementary material for: Morphology controlled synthesis and modification of high-performance LiMnPO4 cathode materials for Li-ion batteries
Source: Royal Society of Chemistry journal article supplement (doi:10.1039/c2jm30821e), 2012-01-01
Supplement: c2jm30821e.pdf [file c2jm30821e.pdf]

## Electronic Supplementary Information

### **Morphology Controlled Synthesis and Modification of High-Performance LiMnPO<sub>4</sub> Cathode Materials for Li-ion Batteries**

Zhihong Qin, Xufeng Zhou\*, Yonggao Xia, Changlin Tang, and Zhaoping Liu\*

Ningbo Institute of Material Technology and Engineering, Chinese Academy of Sciences (CAS), Ningbo 315201, P. R. China.

Email: liuzp@nimte.ac.cn; zhouxf@nitme.ac.cn

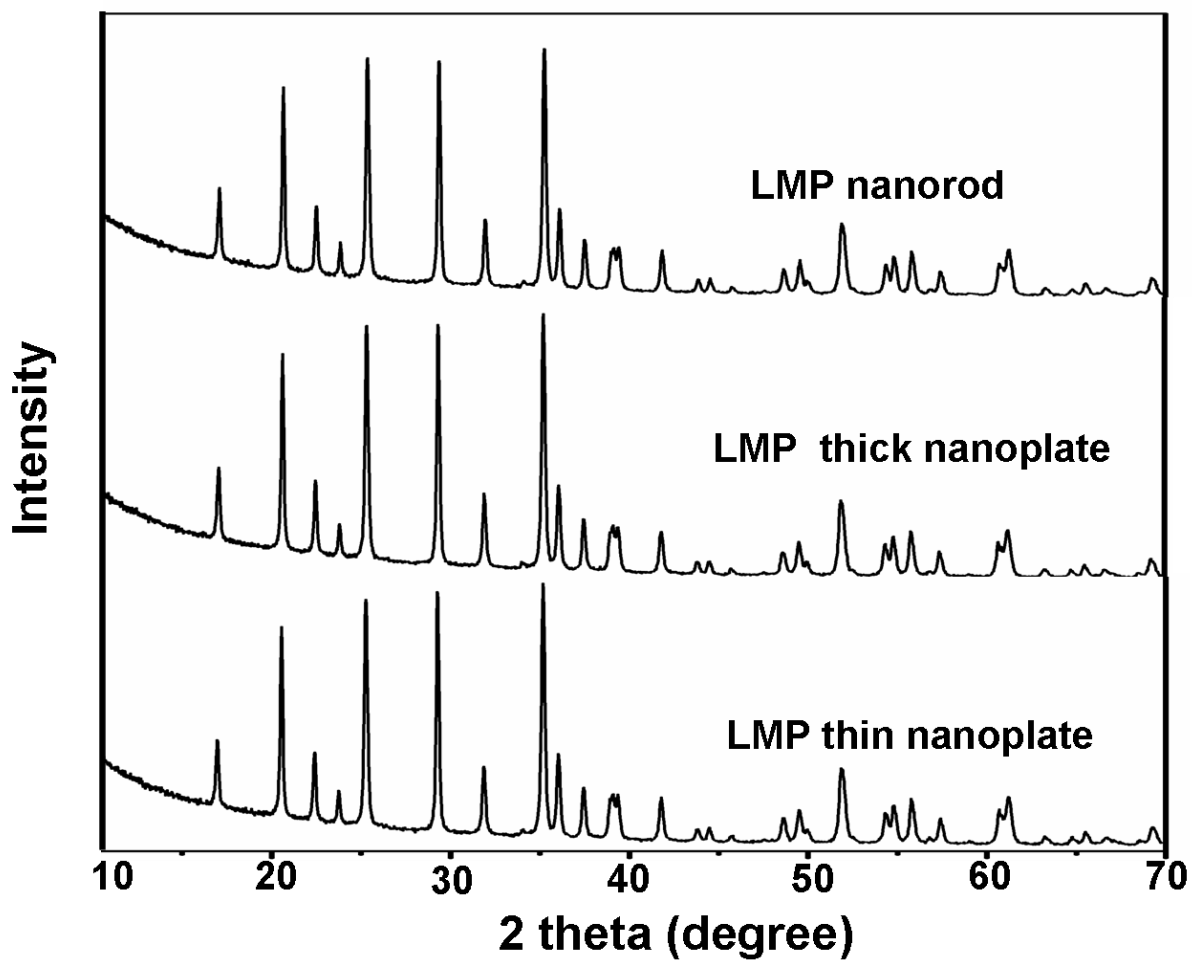

**Figure S1.** XRD patterns of LMP products: a) LMP nanorod, b) LMP thick nanoplate and c) LMP thin nanoplate obtained by the solvothermal method.

**Table S1**

Refined lattice parameters of LMP nanocrystals with different morphologies

| <b>sample</b>                             | <b><i>a</i> (Å)</b> | <b><i>b</i> (Å)</b> | <b><i>c</i> (Å)</b> | <b><i>V</i>(Å<sup>3</sup>)</b> |
|-------------------------------------------|---------------------|---------------------|---------------------|--------------------------------|
| <b>LiMnPO<sub>4</sub> nanorod</b>         | <b>6.1005</b>       | <b>10.4508</b>      | <b>4.7464</b>       | <b>302.607</b>                 |
| <b>LiMnPO<sub>4</sub> thick nanoplate</b> | <b>6.0997</b>       | <b>10.4493</b>      | <b>4.7456</b>       | <b>302.473</b>                 |
| <b>LiMnPO<sub>4</sub> thin nanoplate</b>  | <b>6.0993</b>       | <b>10.4488</b>      | <b>4.7449</b>       | <b>302.394</b>                 |

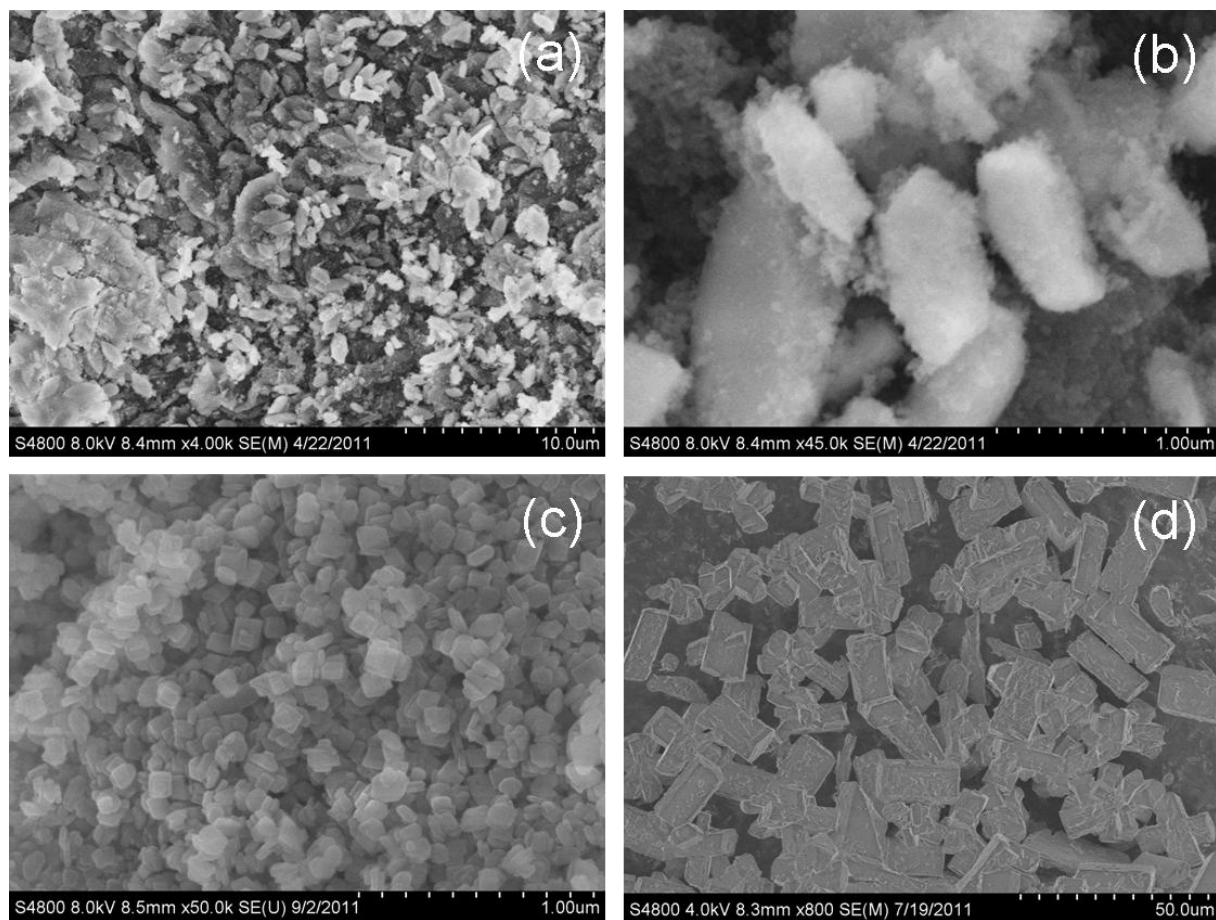

**Figure S2.** SEM images of the LMP products obtained at a) and b) pH =13.5, under air atmosphere, c) pH =13.5, under Ar atmosphere, and d) pH =7.0, under air atmosphere.

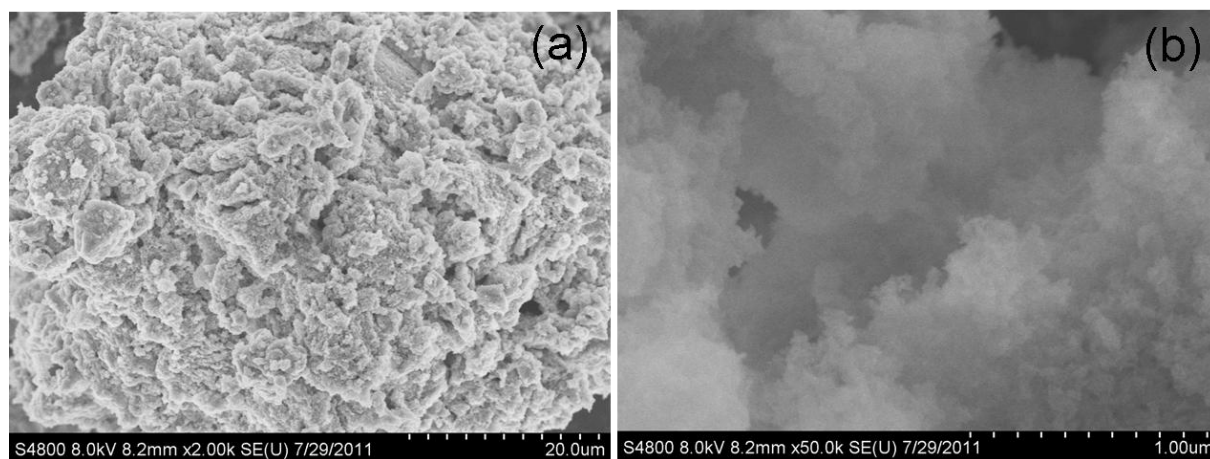

**Figure S3.** SEM images of the intermediate solid precipitates in the reaction suspension obtained at room temperature before solvothermal treatment.
